# Supplementary material for: Unraveling the Phylogenetic Relationships and Taxonomic Status of a Puzzling Freshwater Mussel Genus Inversidens (Bivalvia, Unionidae) through Multilocus Phylogeny and Mitochondrial Phylogenomics
Source: Hindawi journal article supplement (doi:10.1155/2024/1499508), 2024-01-08
Supplement: f1 [file 1499508.f1.zip]

Archive with 3 entries (3 files):
- Supplementary Figure 1.pdf
- Supplementary Figure 2.pdf
- Supplementary Table (1).pdf
