# Supplementary material for: Unraveling the Phylogenetic Relationships and Taxonomic Status of a Puzzling Freshwater Mussel Genus Inversidens (Bivalvia, Unionidae) through Multilocus Phylogeny and Mitochondrial Phylogenomics
Source: Hindawi journal article supplement (doi:10.1155/2024/1499508), 2024-01-08
Supplement: f1 [file 1499508.f1.zip]

ML

### Subfamily

- Unioninae
- Parreysiinae
- Gonideinae
- Amblesinae

### Tribe

- Gonideini
- Pseudodontini
- Lamprotulini
- Rectidentini
- Contradentini
- Chamberlainiini

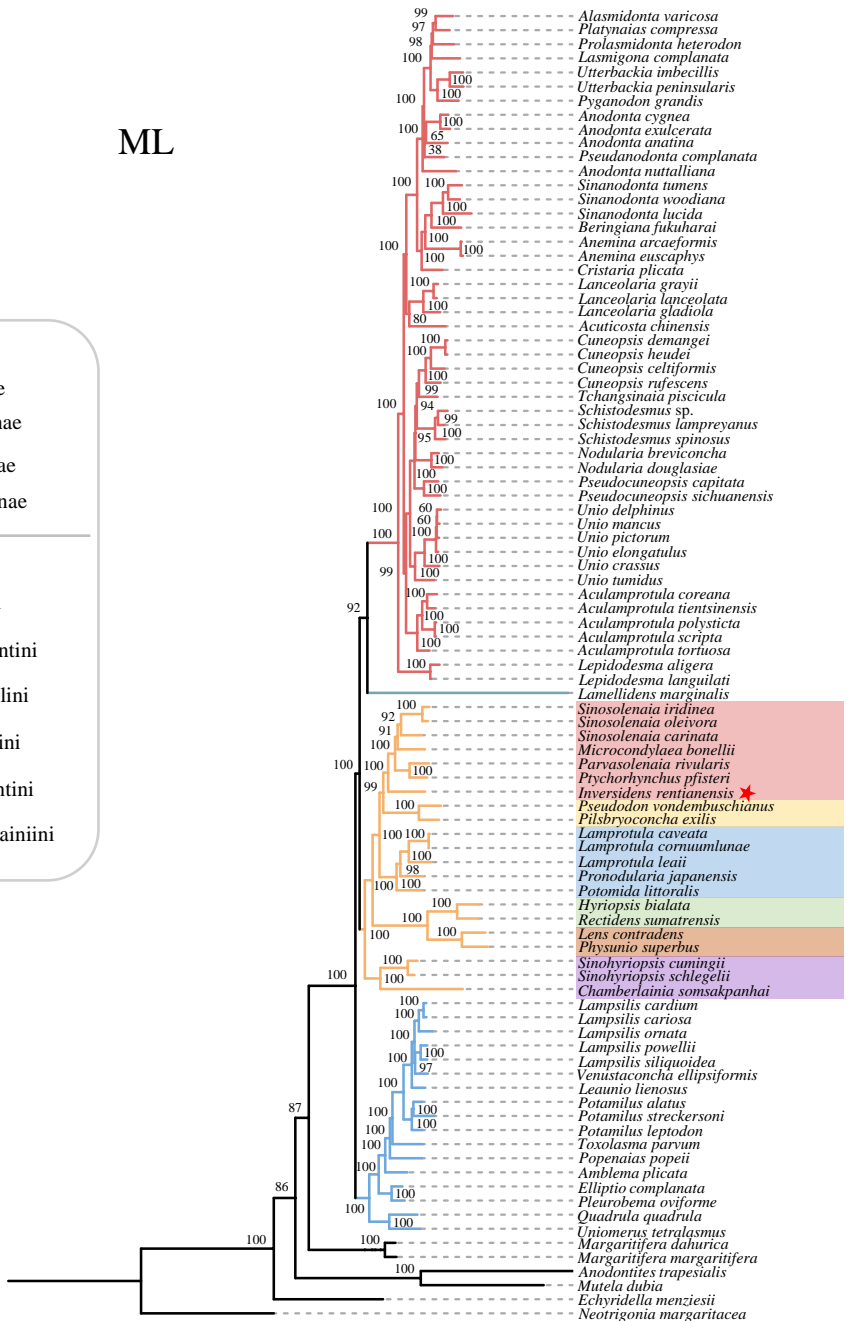

Tree scale: 1
