# Supplementary material for: Unraveling the Phylogenetic Relationships and Taxonomic Status of a Puzzling Freshwater Mussel Genus Inversidens (Bivalvia, Unionidae) through Multilocus Phylogeny and Mitochondrial Phylogenomics
Source: Hindawi journal article supplement (doi:10.1155/2024/1499508), 2024-01-08
Supplement: f1 [file 1499508.f1.zip › Supplementary Table (1).pdf]

Supplementary Table S1. Partitioning strategies from ModerFinder and PartitionFinder for mtDNA dataset.

| <b>PartitionFinder for BI analysis</b> |            |                                       |
|----------------------------------------|------------|---------------------------------------|
| Subset                                 | Best Model | Partition names                       |
| 1                                      | GTR+I+G    | 16Sdataset_mafft_gb                   |
| 2                                      | GTR+I+G    | COIdataset_NT_removed_chars_gb_codon1 |
| 3                                      | F81+I      | COIdataset_NT_removed_chars_gb_codon2 |
| 4                                      | GTR+G      | COIdataset_NT_removed_chars_gb_codon3 |
| 5                                      | SYM+I+G    | ND1_NT_removed_chars_gb_codon1        |
| 6                                      | GTR+I+G    | ND1_NT_removed_chars_gb_codon2        |
| 7                                      | GTR+G      | ND1_NT_removed_chars_gb_codon3        |

  

| <b>ModelFinder for ML analysis</b> |            |                                       |
|------------------------------------|------------|---------------------------------------|
| Subset                             | Best Model | Partition names                       |
| 1                                  | TIM2+F+G4  | 16Sdataset_mafft_gb                   |
| 2                                  | TN+F+G4    | COIdataset_NT_removed_chars_gb_codon1 |
| 3                                  | F81+F+I+G4 | COIdataset_NT_removed_chars_gb_codon2 |
| 4                                  | TIM+F+G4   | COIdataset_NT_removed_chars_gb_codon3 |
| 5                                  | TIM2e+I+G4 | ND1_NT_removed_chars_gb_codon1        |
| 6                                  | GTR+F+I+G4 | ND1_NT_removed_chars_gb_codon2        |
| 7                                  | TPM3u+F+G4 | ND1_NT_removed_chars_gb_codon3        |

Supplementary Table S2. Partitioning strategies from ModerFinder and PartitionFinder for nuDNA dataset.

| <b>PartitionFinder for BI analysis</b> |            |                     |
|----------------------------------------|------------|---------------------|
| Subset                                 | Best Model | Partition names     |
| 1                                      | K80+I      | 18s_mafft_gb        |
| 2                                      | GTR+I+G    | 28Sdataset_mafft_gb |

  

| <b>ModelFinder for ML analysis</b> |            |                     |
|------------------------------------|------------|---------------------|
| Subset                             | Best Model | Partition names     |
| 1                                  | K2P+I      | 18s_mafft_gb        |
| 2                                  | TPM3u+F+G4 | 28Sdataset_mafft_gb |

Supplementary Table S3. Partitioning strategies from ModerFinder and PartitionFinder for concatenated five-gene dataset.

| <b>PartitionFinder for BI analysis</b> |            |                                       |
|----------------------------------------|------------|---------------------------------------|
| Subset                                 | Best Model | Partition names                       |
| 1                                      | GTR+I+G    | 16Sdataset_mafft_gb                   |
| 2                                      | SYM+I      | 18s_mafft_gb                          |
| 3                                      | GTR+I+G    | 28Sdataset_mafft_gb                   |
| 4                                      | GTR+I+G    | COIdataset_NT_removed_chars_gb_codon1 |
| 5                                      | F81+I      | COIdataset_NT_removed_chars_gb_codon2 |
| 6                                      | GTR+G      | COIdataset_NT_removed_chars_gb_codon3 |
| 7                                      | SYM+I+G    | ND1_NT_removed_chars_gb_codon1        |
| 8                                      | GTR+I+G    | ND1_NT_removed_chars_gb_codon2        |
| 9                                      | GTR+G      | ND1_NT_removed_chars_gb_codon3        |

| <b>ModelFinder for ML analysis</b> |             |                                       |
|------------------------------------|-------------|---------------------------------------|
| Subset                             | Best Model  | Partition names                       |
| 1                                  | TIM2+F+I+G4 | 16Sdataset_mafft_gb                   |
| 2                                  | K3P+I       | 18s_mafft_gb                          |
| 3                                  | TIM3+F+G4   | 28Sdataset_mafft_gb                   |
| 4                                  | TN+F+I+G4   | COIdataset_NT_removed_chars_gb_codon1 |
| 5                                  | F81+F+I     | COIdataset_NT_removed_chars_gb_codon2 |
| 6                                  | TIM+F+G4    | COIdataset_NT_removed_chars_gb_codon3 |
| 7                                  | TIM2e+I+G4  | ND1_NT_removed_chars_gb_codon1        |
| 8                                  | GTR+F+I+G4  | ND1_NT_removed_chars_gb_codon2        |
| 9                                  | HKY+F+G4    | ND1_NT_removed_chars_gb_codon3        |

| <b>PartitionFinder for BEAST analysis</b> |            |       |                                       |
|-------------------------------------------|------------|-------|---------------------------------------|
| Subset names                              | Best model | Sites | Partition names                       |
| 1                                         | GTR+I+G+X  | 469   | 16Sdataset_mafft_gb                   |
| 2                                         | SYM+I      | 642   | 18s_mafft_gb                          |
| 3                                         | GTR+I+G+X  | 743   | 28Sdataset_mafft_gb                   |
| 4                                         | TRN+I+G+X  | 219   | COIdataset_NT_removed_chars_gb_codon1 |
| 5                                         | HKY+I+X    | 219   | COIdataset_NT_removed_chars_gb_codon2 |
| 6                                         | GTR+G+X    | 219   | COIdataset_NT_removed_chars_gb_codon3 |
| 7                                         | GTR+I+G+X  | 294   | ND1_NT_removed_chars_gb_codon1        |
| 8                                         | GTR+I+G+X  | 294   | ND1_NT_removed_chars_gb_codon2        |
| 9                                         | GTR+G+X    | 294   | ND1_NT_removed_chars_gb_codon3        |

Supplementary Table S4. Partitioning strategies from ModerFinder and PartitionFinder for mitogenome dataset.

| PartitionFinder for mitogenome dataset |            |                                                                                                                                                                                                                 |
|----------------------------------------|------------|-----------------------------------------------------------------------------------------------------------------------------------------------------------------------------------------------------------------|
| Subset                                 | Best Model | Partition names                                                                                                                                                                                                 |
| 1                                      | GTR+I+G    | cox2_NT_removed_chars_gb_codon1, cox3_NT_removed_chars_gb_codon1, cox1_NT_removed_chars_gb_codon1, atp6                                                                                                         |
| 2                                      | GTR+I+G    | nad4_NT_removed_chars_gb_codon2, nad5_NT_removed_chars_gb_codon2, nad4L_NT_removed_chars_gb_codon2, atp6<br>nad3_NT_removed_chars_gb_codon3, nad4L_NT_removed_chars_gb_codon3, nad4_NT_removed_chars_gb_codon3, |
| 3                                      | GTR+I+G    | atp6_NT_removed_chars_gb_codon3, cox2_NT_removed_chars_gb_codon3, cox3_NT_removed_chars_gb_codon3,<br>nad5_NT_removed_chars_gb_codon3, cox1_NT_removed_chars_gb_codon3                                          |
| 4                                      | GTR+I+G    | cox1_NT_removed_chars_gb_codon2, cox3_NT_removed_chars_gb_codon2, nad3_NT_removed_chars_gb_codon2,<br>cox2_NT_removed_chars_gb_codon2                                                                           |
| 5                                      | GTR+I+G    | cytb_NT_removed_chars_gb_codon1, nad1_NT_removed_chars_gb_codon1, nad2_NT_removed_chars_gb_codon1,<br>nad6_NT_removed_chars_gb_codon1                                                                           |
| 6                                      | GTR+I+G    | nad6_NT_removed_chars_gb_codon2, nad2_NT_removed_chars_gb_codon2, cytb_NT_removed_chars_gb_codon2,<br>nad1_NT_removed_chars_gb_codon2                                                                           |
| 7                                      | GTR+I+G    | cytb_NT_removed_chars_gb_codon3, nad6_NT_removed_chars_gb_codon3, nad1_NT_removed_chars_gb_codon3,<br>nad2_NT_removed_chars_gb_codon3                                                                           |
| 8                                      | GTR+I+G    | nad4_NT_removed_chars_gb_codon1, nad5_NT_removed_chars_gb_codon1, nad3_NT_removed_chars_gb_codon1,<br>nad4L_NT_removed_chars_gb_codon1                                                                          |
| 9                                      | GTR+I+G    | rrnL_mafft_gb_codon3, rrnL_mafft_gb_codon1, rrnL_mafft_gb_codon2                                                                                                                                                |
| 10                                     | GTR+G      | rrnS_mafft_gb                                                                                                                                                                                                   |

| ModelFinder for mitogenome dataset |               |                                  |
|------------------------------------|---------------|----------------------------------|
| Subset                             | Best Model    | Partition names                  |
| 1                                  | TIM2+F+I+G4   | atp6_NT_removed_chars_gb_codon1  |
| 2                                  | TVM+F+G4      | atp6_NT_removed_chars_gb_codon2  |
| 3                                  | TIM3+F+I+G4   | atp6_NT_removed_chars_gb_codon3  |
| 4                                  | TN+F+I+G4     | cox1_NT_removed_chars_gb_codon1  |
| 5                                  | TVM+F+I+G4    | cox1_NT_removed_chars_gb_codon2  |
| 6                                  | GTR+F+I+G4    | cox1_NT_removed_chars_gb_codon3  |
| 7                                  | HKY+F+I+G4    | cox2_NT_removed_chars_gb_codon1  |
| 8                                  | TVM+F+I+G4    | cox2_NT_removed_chars_gb_codon2  |
| 9                                  | TIM3+F+I+G4   | cox2_NT_removed_chars_gb_codon3  |
| 10                                 | K3Pu+F+I+G4   | cox3_NT_removed_chars_gb_codon1  |
| 11                                 | GTR+F+I+G4    | cox3_NT_removed_chars_gb_codon2  |
| 12                                 | TN+F+I+G4     | cox3_NT_removed_chars_gb_codon3  |
| 13                                 | TIM2e+I+G4    | cytb_NT_removed_chars_gb_codon1  |
| 14                                 | TVM+F+I+G4    | cytb_NT_removed_chars_gb_codon2  |
| 15                                 | TIM2+F+ASC+G4 | cytb_NT_removed_chars_gb_codon3  |
| 16                                 | TIM2e+I+G4    | nad1_NT_removed_chars_gb_codon1  |
| 17                                 | GTR+F+I+G4    | nad1_NT_removed_chars_gb_codon2  |
| 18                                 | TIM3+F+ASC+G4 | nad1_NT_removed_chars_gb_codon3  |
| 19                                 | TIM2+F+I+G4   | nad2_NT_removed_chars_gb_codon1  |
| 20                                 | GTR+F+I+G4    | nad2_NT_removed_chars_gb_codon2  |
| 21                                 | TIM2+F+I+G4   | nad2_NT_removed_chars_gb_codon3  |
| 22                                 | TIM2+F+I+G4   | nad3_NT_removed_chars_gb_codon1  |
| 23                                 | TVM+F+I+G4    | nad3_NT_removed_chars_gb_codon2  |
| 24                                 | GTR+F+I+G4    | nad3_NT_removed_chars_gb_codon3  |
| 25                                 | TIM2+F+I+G4   | nad4L_NT_removed_chars_gb_codon1 |
| 26                                 | TIM3+F+I+G4   | nad4L_NT_removed_chars_gb_codon2 |
| 27                                 | TIM3+F+I+G4   | nad4L_NT_removed_chars_gb_codon3 |
| 28                                 | TPM2u+F+I+G4  | nad4_NT_removed_chars_gb_codon1  |
| 29                                 | GTR+F+I+G4    | nad4_NT_removed_chars_gb_codon2  |
| 30                                 | TIM3+F+I+G4   | nad4_NT_removed_chars_gb_codon3  |
| 31                                 | TIM2+F+I+G4   | nad5_NT_removed_chars_gb_codon1  |
| 32                                 | GTR+F+I+G4    | nad5_NT_removed_chars_gb_codon2  |
| 33                                 | TIM3+F+ASC+G4 | nad5_NT_removed_chars_gb_codon3  |
| 34                                 | TPM2u+F+I+G4  | nad6_NT_removed_chars_gb_codon1  |
| 35                                 | GTR+F+I+G4    | nad6_NT_removed_chars_gb_codon2  |
| 36                                 | TIM2+F+ASC+G4 | nad6_NT_removed_chars_gb_codon3  |
| 37                                 | TIM2+F+I+G4   | rrnL_mafft_gb                    |
| 38                                 | TIM2+F+G4     | rrnS_mafft_gb                    |
